# Supplementary material for: Dynamically evolving novel overlapping gene as a factor in the SARS-CoV-2 pandemic
Source: eLife. 2020 Oct 1;9:e59633. doi: 10.7554/eLife.59633 (PMC7655111; doi:10.7554/eLife.59633)
Supplement: Figure 4—source data 1. — Amino acid alignments shown in Figure 4. The full translation of the ORF3b region is provided for ORF3b. Note that the pangolin-CoV GD/1 sequence has been masked as X (license constraint), but can be acquired with GISAID registration. [file elife-59633-fig4-data1.xlsx]

## Sheet: ORF3c_seq
seq_ID	1	2	3	4	5	6	7	8	9	10	11	12	13	14	15	16	17	18	19	20	21	22	23	24	25	26	27	28	29	30	31	32	33	34	35	36	37	38	39	40	41	42
Bat_SARS-like_CoV_BtKY72/2007	M	L	F	L	Q	I	L	F	M	L	R	L	P	S	L	Y	K	P	L	C	L	S	D	G	L	L	L	A	L	H	C	L	L	F	F	K	M	L	Q	K	X	F
Bat_CoV_BM48-31/BGR/2008	M	F	L	L	Q	V	L	F	I	L	Q	R	P	S	L	Y	R	P	L	Y	L	S	D	G	L	L	L	A	L	H	F	L	L	F	F	K	A	L	R	N	X	Y
Bat_SARS-like_CoV_ZC45/2017	V	L	L	L	Q	I	L	F	A	L	L	Q	Q	Y	R	Y	K	P	H	S	L	S	D	G	L	L	L	A	L	Q	F	L	L	F	F	K	A	L	Q	K	X	L
Pangolin_CoV_PD/1/2019	X	X	X	X	X	X	X	X	X	X	X	X	X	X	X	X	X	X	X	X	X	X	X	X	X	X	X	X	X	X	X	X	X	X	X	X	X	X	X	X	X	X
Bat_CoV_RaTG13/2013	M	L	L	L	Q	I	L	F	A	L	L	Q	R	Y	R	Y	K	P	H	S	L	S	D	G	L	L	L	A	L	H	F	L	L	F	F	K	A	L	P	R	S	X
SARS-CoV-2_Wuhan-Hu-1/2019	M	L	L	L	Q	I	L	F	A	L	L	Q	R	Y	R	Y	K	P	H	S	L	S	D	G	L	L	L	A	L	H	F	L	L	F	F	R	A	L	P	K	S	X
Pangolin_CoV_GX/P5L/2017	M	L	L	L	Q	I	L	F	A	L	L	Q	R	Y	R	Y	K	P	H	S	L	S	D	G	L	L	L	A	L	H	F	L	L	F	F	R	A	L	P	K	X	L
Bat_SARS-CoV_HKU3-12/2004-2008	M	L	L	L	Q	V	L	F	M	L	L	Q	R	Y	H	Y	K	P	H	S	L	S	D	G	L	L	L	A	L	H	F	L	L	F	F	K	A	L	L	K	X	L
Bat_SARS-CoV_HKU3-6/2004-2008	M	L	L	L	Q	V	L	F	M	L	L	Q	R	Y	H	Y	K	P	H	S	L	S	D	G	L	L	L	A	L	H	F	L	L	F	F	K	A	L	L	K	X	L
Bat_CoV_HuB2013/2013	M	L	L	L	Q	V	L	F	M	L	Q	Q	R	Y	R	Y	K	P	H	S	L	S	D	G	L	L	L	A	L	H	F	L	L	F	F	K	A	L	P	K	X	L
Bat_CoV_JTMC15/2013	M	L	F	L	Q	V	L	F	M	L	L	Q	R	Y	R	Y	K	P	H	S	L	S	D	G	L	L	L	A	L	H	F	L	L	F	F	K	A	L	P	K	X	L
Bat_CoV_YN2018C/2016	M	L	L	L	Q	V	L	F	M	L	L	Q	R	Y	R	Y	K	P	H	S	L	S	D	G	L	L	L	A	L	H	F	L	L	F	F	K	A	L	P	K	X	L
Bat_SARS-like_CoV_Rs4237/2013	M	L	L	L	Q	V	L	F	M	L	L	Q	R	Y	R	Y	K	P	H	S	L	S	D	G	L	L	L	A	L	H	F	L	L	F	F	K	A	L	P	K	X	L
Bat_SARS-like_CoV_Rs4081/2012	M	L	L	L	Q	V	L	F	M	L	L	Q	R	Y	R	Y	K	P	H	S	L	L	D	G	L	L	L	A	L	H	F	L	L	F	F	R	A	L	P	K	X	L
Bat_SARS-CoV_Rs672/2006	M	L	F	L	Q	V	L	F	M	L	L	Q	R	Y	R	Y	K	P	H	S	L	S	D	G	L	L	L	A	L	H	F	L	L	F	F	K	A	L	P	K	X	L
Bat_CoV_YN2018B/2016	M	L	L	L	Q	V	L	F	M	L	Q	Q	R	Y	R	Y	R	P	H	S	L	S	D	G	L	L	L	A	L	H	F	L	L	F	F	R	A	L	P	K	X	L
Bat_SARS-like_CoV_Rs3367/2012	M	L	L	L	Q	V	L	F	M	L	Q	Q	R	Y	R	Y	K	P	H	S	L	S	D	G	L	L	L	A	L	H	F	L	L	F	F	R	A	L	P	K	X	F
Bat_SARS-like_CoV_Rs7327/2014	M	L	L	L	Q	V	L	F	M	L	Q	Q	R	Y	H	Y	K	P	H	S	L	S	D	G	L	L	L	A	L	H	F	L	L	F	F	R	A	L	P	K	X	L
Bat_SARS-like_CoV_Rs4231/2013	M	L	L	L	Q	V	L	F	M	L	Q	Q	R	Y	R	Y	R	P	H	S	L	S	D	G	L	L	L	A	L	H	F	L	L	F	F	R	A	L	P	K	X	L
SARS_CoV_Tor2/2003	M	L	L	L	Q	V	L	F	M	L	Q	Q	R	Y	R	Y	K	P	H	S	L	S	D	G	L	L	L	A	L	H	F	L	L	F	F	R	A	L	P	K	X	L
SARS-CoV_TW11/2003	M	L	L	L	Q	V	L	F	M	L	Q	Q	R	Y	R	Y	K	P	H	S	L	S	D	G	L	L	L	A	L	H	F	L	L	F	F	R	A	L	P	K	X	L

## Sheet: ORF3d_seq
seq_ID	1	2	3	4	5	6	7	8	9	10	11	12	13	14	15	16	17	18	19	20	21	22	23	24	25	26	27	28	29	30	31	32	33	34	35	36	37	38	39	40	41	42	43	44	45	46	47	48	49
SARS-CoV_TW11/2003	M	A	C	Y	W	R	C	I	S	C	C	F	S	E	R	Y	Q	N	N	C	A	Q	X	K	M	A	A	S	P	L	X	G	L	P	V	H	L	Q	F	T	A	A	I	C	Y	H	L	F	T
Pangolin_CoV_GX/P5L/2017	M	A	Y	C	W	R	C	T	S	C	C	F	S	E	R	F	Q	N	N	Y	T	Q	K	E	V	A	I	C	S	L	Q	G	C	S	F	C	L	Q	L	A	S	T	I	C	Y	S	L	L	S
Pangolin_CoV_PD/1/2019	X	X	X	X	X	X	X	X	X	X	X	X	X	X	X	X	X	X	X	X	X	X	X	X	X	X	X	X	X	X	X	X	X	X	X	X	X	X	X	X	X	X	X	X	X	X	X	X	X
Bat_SARS-CoV_Rs672/2006	M	A	C	C	W	R	C	T	S	C	C	F	S	K	R	F	Q	S	D	C	A	S	X	E	V	A	A	R	P	V	X	R	H	S	A	C	L	Q	F	A	A	T	F	C	D	N	L	L	T
Bat_SARS-CoV_HKU3-6/2004-2008	M	A	Y	C	W	R	C	T	S	C	C	F	S	K	R	F	X	S	N	C	A	S	X	K	V	A	A	R	L	I	X	R	R	S	T	C	M	X	Y	A	A	A	F	C	D	N	L	L	T
Bat_SARS-CoV_HKU3-12/2004-2008	M	A	Y	C	W	R	C	T	S	C	C	F	S	K	R	F	X	S	N	C	A	S	X	K	V	A	A	R	L	I	X	R	R	S	T	C	M	X	Y	A	A	A	F	C	D	N	L	L	T
Bat_CoV_BM48-31/BGR/2008	M	A	C	C	W	R	C	I	S	C	C	F	S	K	R	C	E	I	N	T	F	X	Q	S	L	A	A	L	L	I	P	E	L	S	I	A	L	Q	C	A	S	Y	C	F	D	S	L	L	A
Bat_SARS-like_CoV_Rs3367/2012	M	A	C	Y	W	R	C	I	S	C	C	F	S	E	R	Y	Q	N	N	F	A	Q	X	K	M	A	A	S	P	L	X	G	L	P	V	H	L	Q	F	T	A	A	I	C	Y	H	L	F	T
Bat_CoV_HuB2013/2013	M	A	C	C	W	R	C	T	S	C	C	F	S	K	R	F	Q	S	D	C	A	S	X	E	V	A	A	C	L	V	X	R	H	S	V	C	L	Q	P	A	A	T	F	C	D	N	L	L	T
Bat_CoV_JTMC15/2013	M	A	C	Y	W	R	C	T	S	C	C	F	S	K	R	F	Q	S	N	C	A	S	X	E	V	A	A	C	L	I	Q	R	L	S	I	S	L	X	L	A	A	T	L	C	D	N	L	F	T
Bat_SARS-like_CoV_BtKY72/2007	M	A	Y	C	W	R	C	I	A	C	C	F	S	K	C	F	K	S	N	S	F	X	Q	L	V	A	A	L	P	L	S	K	L	P	T	C	L	Q	S	V	S	W	F	S	H	S	L	C	T
Bat_SARS-like_CoV_Rs4081/2012	M	A	C	C	W	R	C	T	S	C	C	F	S	E	R	F	Q	S	D	C	A	S	X	E	M	A	A	R	F	V	X	R	H	A	A	C	L	Q	S	A	A	T	L	C	D	N	L	F	T
Bat_SARS-like_CoV_Rs4231/2013	M	A	C	Y	W	R	C	I	S	C	C	F	S	E	R	Y	Q	N	N	C	A	Q	X	K	M	A	A	S	P	L	X	G	L	P	V	H	L	Q	F	T	A	A	I	C	Y	H	L	F	T
Bat_SARS-like_CoV_Rs4237/2013	M	A	C	C	W	R	C	T	S	C	C	F	S	K	R	F	Q	S	D	C	A	S	X	E	V	A	A	R	Y	V	Q	R	H	S	A	C	L	Q	F	A	A	T	L	C	N	N	L	L	T
Bat_SARS-like_CoV_Rs7327/2014	M	A	C	Y	W	R	C	I	S	C	C	F	S	E	R	Y	Q	N	N	C	A	Q	X	K	M	A	A	S	P	L	X	G	L	P	V	H	L	Q	F	I	A	A	I	C	Y	H	L	F	T
Bat_SARS-like_CoV_ZC45/2017	M	A	C	C	W	R	C	N	S	C	C	F	S	K	R	F	K	N	N	Y	T	Q	K	E	M	A	V	S	P	L	X	R	C	S	F	C	L	Q	L	A	S	A	V	F	N	S	L	F	S
Bat_CoV_YN2018B/2016	M	A	C	Y	W	R	C	I	S	C	C	F	S	E	R	Y	Q	N	N	C	A	Q	X	K	M	A	A	S	P	L	X	G	L	P	V	H	L	Q	F	T	A	A	I	Y	Y	H	L	F	T
Bat_CoV_YN2018C/2016	M	A	C	C	W	R	C	T	S	C	C	F	S	K	R	F	Q	S	D	C	V	S	X	E	V	A	A	R	S	A	Q	R	H	S	A	C	L	Q	F	A	A	T	L	C	N	N	L	L	T
Bat_CoV_RaTG13/2013	M	A	Y	C	W	R	C	I	S	C	C	F	S	K	R	F	Q	D	H	N	P	X	K	E	M	A	T	S	T	L	X	G	Y	S	L	Y	L	Q	L	A	A	A	V	C	N	S	L	L	T
SARS_CoV_Tor2/2003	M	A	C	Y	W	R	C	I	S	C	C	F	S	E	R	Y	Q	N	N	C	A	Q	X	K	M	A	A	S	P	L	X	G	L	P	V	H	L	Q	F	T	A	A	I	C	Y	H	L	F	T
SARS-CoV-2_Wuhan-Hu-1/2019	M	A	Y	C	W	R	C	T	S	C	C	F	S	E	R	F	Q	N	H	N	P	Q	K	E	M	A	T	S	T	L	Q	G	C	S	L	C	L	Q	L	A	V	V	V	C	N	S	L	L	T
[truncated: 9 more columns]

## Sheet: ORF3b_seq
seq_ID	1	2	3	4	5	6	7	8	9	10	11	12	13	14	15	16	17	18	19	20	21	22	23	24	25	26	27	28	29	30	31	32	33	34	35	36	37	38	39	40	41	42	43	44	45	46	47	48	49
Bat_SARS-like_CoV_BtKY72/2007	M	M	P	P	T	L	F	V	G	I	H	T	L	M	T	I	V	F	R	T	I	V	L	L	K	P	X	S	S	L	Q	E	M	V	X	L	F	L	X	K	H	K	T	T	K	L	V	V	L
Bat_CoV_BM48-31/BGR/2008	M	T	Q	T	I	L	F	A	G	I	L	T	L	M	T	I	V	F	L	T	I	A	L	Q	T	L	S	S	S	L	Q	V	M	V	S	L	F	P	F	G	H	K	T	T	K	L	V	V	T
Bat_SARS-like_CoV_ZC45/2017	M	M	P	T	T	F	F	V	G	I	L	I	V	M	T	I	V	Y	H	T	I	V	X	P	L	Q	L	S	S	H	V	V	M	V	L	R	I	P	F	L	R	T	T	T	K	L	V	V	T
Pangolin_CoV_PD/1/2019	X	X	X	X	X	X	X	X	X	X	X	X	X	X	X	X	X	X	X	X	X	X	X	X	X	X	X	X	X	X	X	X	X	X	X	X	X	X	X	X	X	X	X	X	X	X	X	X	X
Bat_CoV_RaTG13/2013	M	M	L	T	T	S	F	V	G	I	L	I	V	M	T	I	V	Y	L	T	I	V	X	L	L	Q	L	S	L	L	Q	V	M	A	Q	Q	V	L	F	L	N	M	T	T	R	L	V	V	I
SARS-CoV-2_Wuhan-Hu-1/2019	M	M	P	T	I	F	F	A	G	I	L	I	V	T	T	I	V	Y	L	T	I	V	X	L	L	Q	L	S	L	L	Q	V	M	A	Q	Q	V	L	F	L	N	M	T	T	R	L	V	V	I
Pangolin_CoV_GX/P5L/2017	M	M	P	I	T	F	F	A	G	I	L	I	A	M	T	I	V	Y	H	I	I	A	X	L	L	Q	L	S	L	H	Q	V	M	A	L	Q	V	L	L	Q	T	M	T	T	K	L	V	V	I
Bat_SARS-CoV_HKU3-12/2004-2008	M	M	L	T	I	L	Y	V	G	I	L	I	T	M	T	T	V	Y	H	T	T	V	S	Q	I	Q	L	S	S	P	Q	V	M	E	Q	I	S	Q	N	X	K	K	T	I	K	L	V	V	I
Bat_SARS-CoV_HKU3-6/2004-2008	M	M	L	T	I	L	Y	V	G	I	L	I	T	M	T	T	V	Y	H	T	T	V	S	Q	I	Q	L	S	S	P	Q	V	M	E	Q	I	S	Q	N	X	K	K	T	I	K	L	V	V	I
Bat_CoV_HuB2013/2013	M	M	L	T	T	L	Y	V	G	T	P	I	A	L	I	T	V	Y	H	T	T	V	S	L	T	Q	L	S	S	R	Q	V	M	E	L	L	S	Q	N	X	K	K	T	T	K	L	V	V	I
Bat_CoV_JTMC15/2013	M	M	P	T	T	L	F	A	G	I	H	I	I	M	T	T	V	Y	H	T	T	V	S	Q	I	Q	S	S	L	L	Q	V	T	A	F	Q	H	Q	N	S	K	N	T	T	K	L	V	V	I
Bat_CoV_YN2018C/2016	M	M	P	T	T	S	F	A	G	I	H	I	T	M	T	T	V	Y	H	T	T	V	S	Q	I	Q	L	S	L	L	Q	V	T	A	F	Q	H	Q	N	S	K	K	T	T	K	L	V	V	I
Bat_SARS-like_CoV_Rs4237/2013	M	M	P	T	T	L	F	A	G	I	H	I	T	M	T	T	V	Y	H	T	T	V	S	Q	I	Q	L	S	L	L	Q	V	T	A	F	Q	H	Q	N	S	K	K	T	T	K	L	V	V	I
Bat_SARS-like_CoV_Rs4081/2012	M	M	S	T	T	L	F	A	G	I	H	I	T	M	T	T	V	Y	H	T	T	V	S	Q	I	Q	L	S	L	L	Q	V	T	A	F	Q	H	Q	N	S	K	K	T	T	K	L	V	V	I
Bat_SARS-CoV_Rs672/2006	M	M	P	T	T	L	F	A	G	I	H	I	T	M	T	T	V	Y	H	I	T	V	S	Q	I	Q	L	S	L	L	Q	V	T	A	F	Q	H	Q	N	S	K	K	T	T	K	L	V	V	I
Bat_CoV_YN2018B/2016	M	M	P	T	T	L	F	A	G	T	H	I	T	M	T	T	V	Y	H	I	T	V	S	Q	I	Q	L	S	L	L	Q	V	T	A	F	Q	H	Q	N	S	K	K	T	T	K	L	V	V	I
Bat_SARS-like_CoV_Rs3367/2012	M	M	P	T	T	L	F	A	G	T	H	I	T	M	T	T	V	Y	R	I	T	V	S	Q	I	Q	L	S	L	L	Q	V	T	A	F	Q	H	Q	N	S	K	K	T	T	K	L	V	V	I
Bat_SARS-like_CoV_Rs7327/2014	M	M	P	T	T	L	F	A	G	T	H	I	T	M	T	T	V	Y	H	I	T	V	S	Q	I	Q	L	S	L	L	Q	V	T	A	F	Q	H	Q	N	S	K	K	T	T	K	L	V	V	I
Bat_SARS-like_CoV_Rs4231/2013	M	M	P	T	T	L	F	A	G	I	H	I	T	M	T	T	V	Y	H	I	T	V	S	Q	I	Q	S	S	L	L	Q	V	T	A	F	Q	H	Q	N	S	K	K	T	T	K	L	V	V	I
SARS_CoV_Tor2/2003	M	M	P	T	T	L	F	A	G	T	H	I	T	M	T	T	V	Y	H	I	T	V	S	Q	I	Q	L	S	L	L	K	V	T	A	F	Q	H	Q	N	S	K	K	T	T	K	L	V	V	I
SARS-CoV_TW11/2003	M	M	P	T	T	L	F	A	G	T	H	I	T	M	T	T	V	Y	H	I	T	V	S	Q	I	Q	L	S	L	L	K	V	T	A	F	Q	H	Q	N	S	K	K	T	T	K	L	V	V	I
[truncated: 107 more columns]
